# Supplementary material for: A phosphite-based layered framework as a novel positive electrode material for Na-ion batteries
Source: Royal Society of Chemistry journal article supplement (doi:10.1039/d0ta10517a), 2021-01-01
Supplement: d0ta10517a1.pdf [file d0ta10517a1.pdf]

Supporting Information

**A phosphite based layered framework as a novel positive electrode material for Na-ion Batteries**

A. Shahul Hameed,<sup>ab</sup> Mirai Ohara,<sup>a</sup> Kei Kubota,<sup>ab</sup> and Shinichi Komaba<sup>\*ab</sup>

*<sup>a</sup>Department of Applied Chemistry, Tokyo University of Science, Tokyo 162-8601, Japan.*

*<sup>b</sup>ESICB, Kyoto University, 1-30 Goryo-Ohara, Nishikyo-ku, Kyoto 615-8245, Japan*

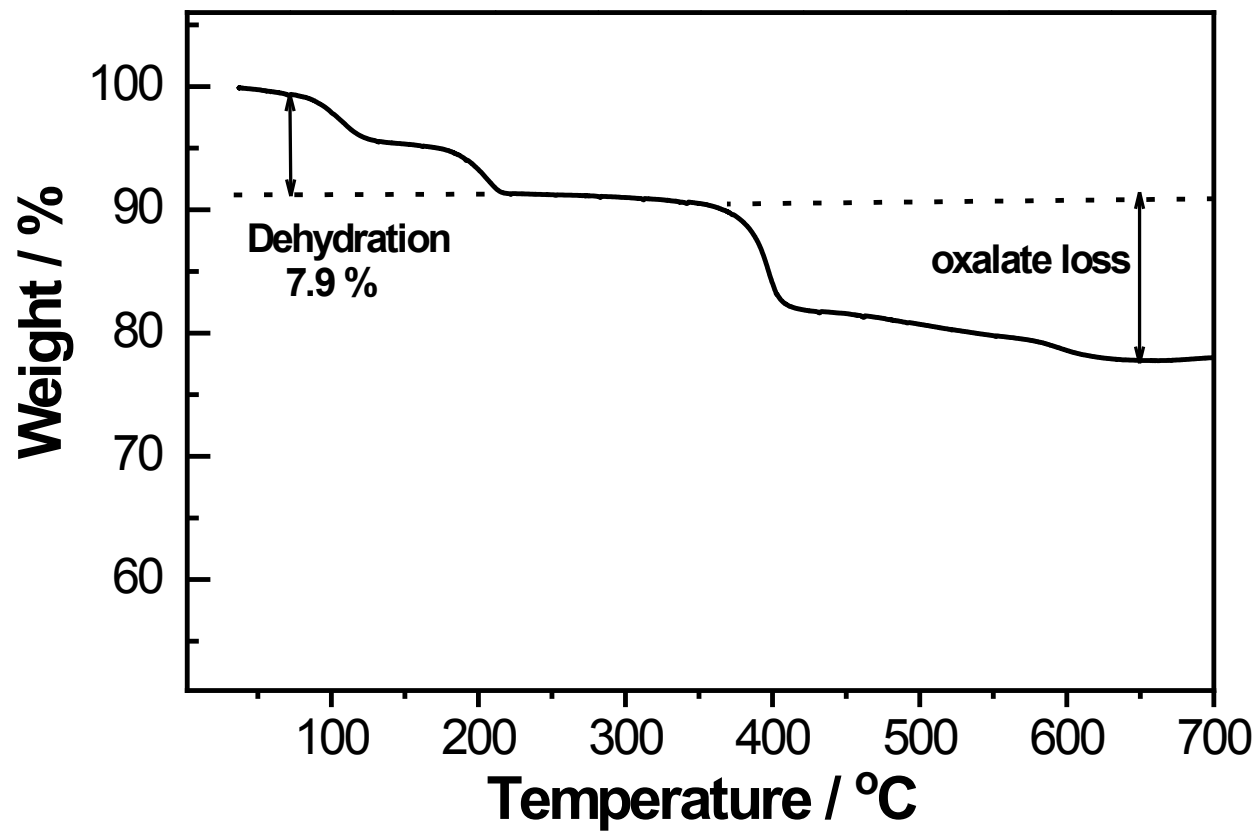

**Fig. S1:** TGA of p-NVPox in nitrogen atmosphere at a scan rate of 5 °C min<sup>-1</sup>

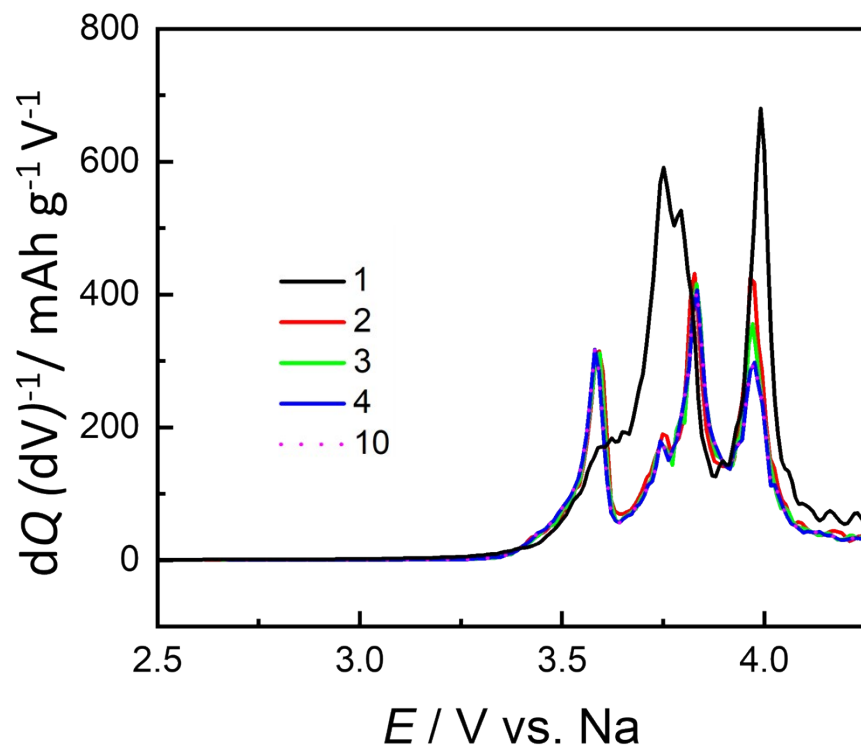

**Fig. S2:** The  $dQ/dV$  plots of p-NVPox (charge curves) for selected cycles

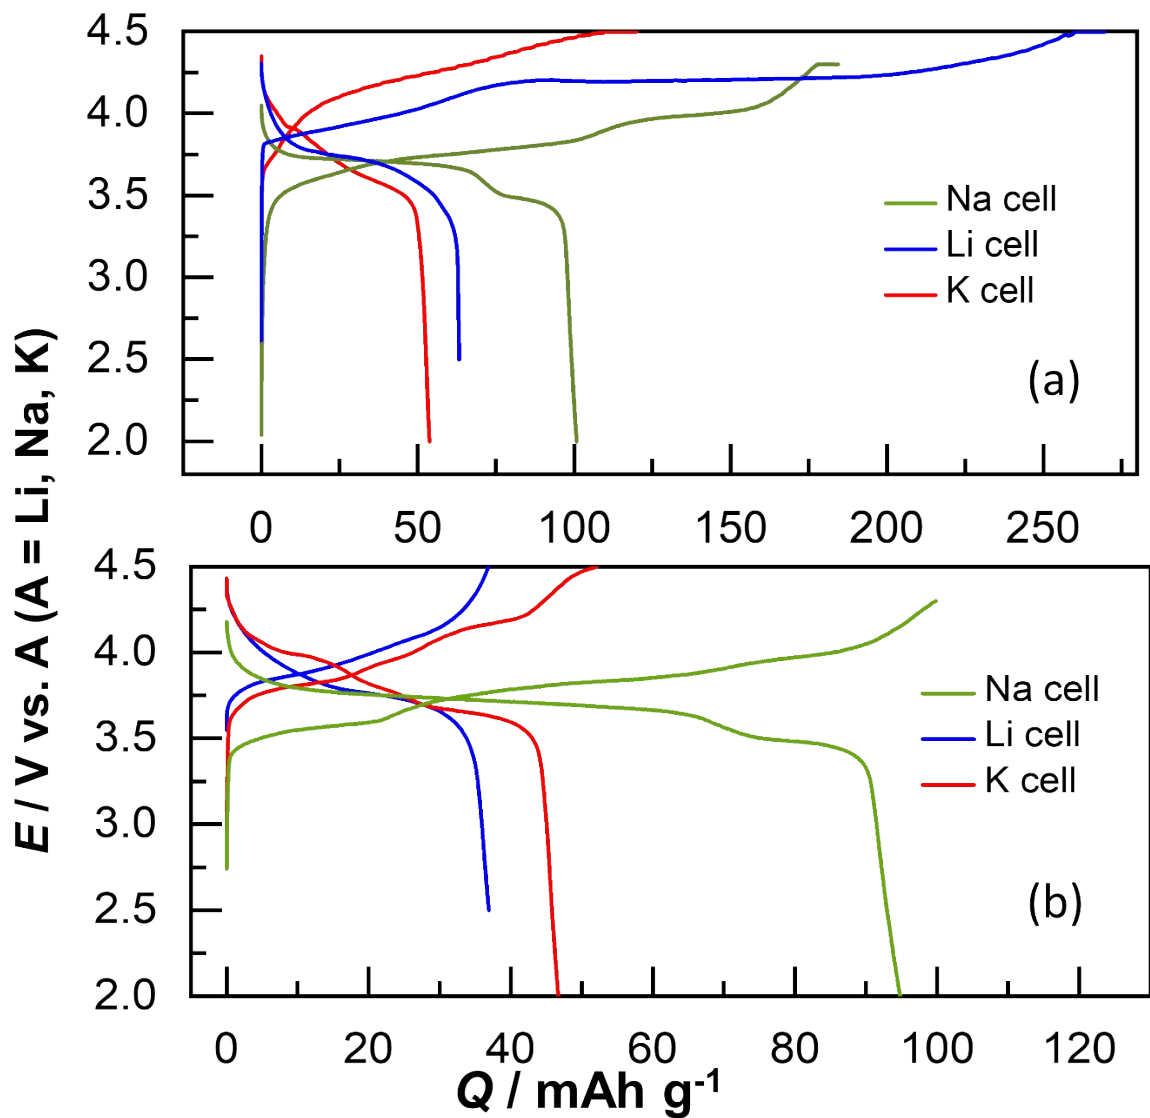

8

**Fig. S3:** Comparison of charge-discharge profiles of p-NVPox in Li-, Na- and K-half cells at 0.1 C for (a) 1<sup>st</sup> cycle, and (b) 10<sup>th</sup> cycle.

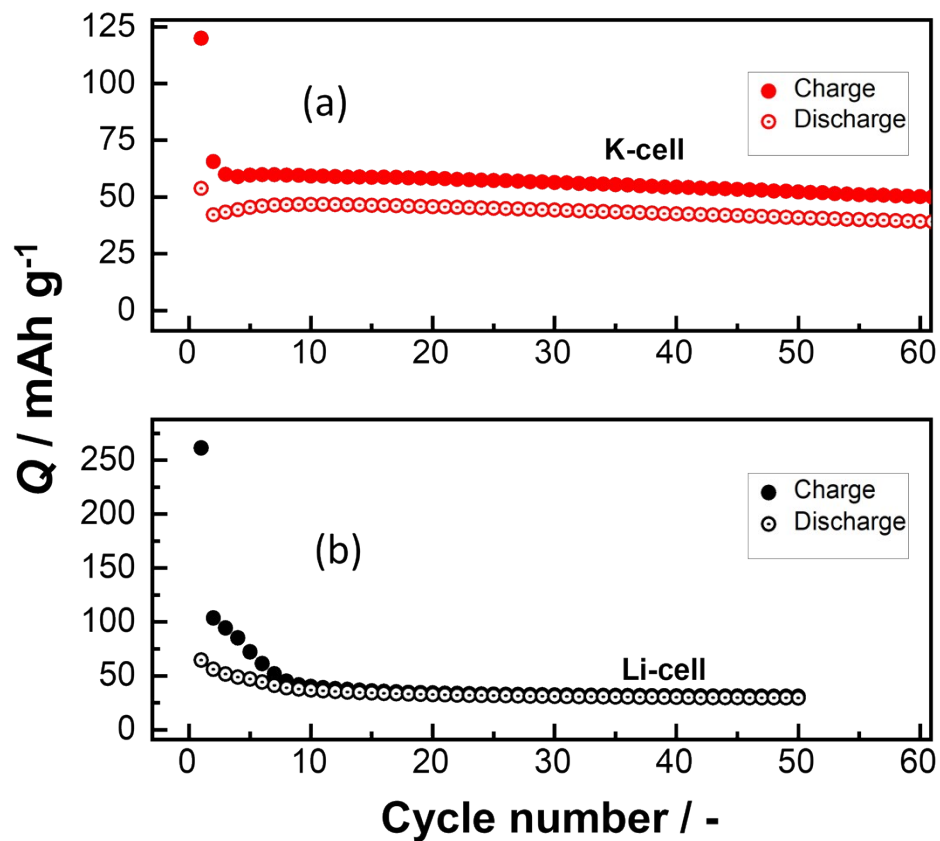

**Fig. S4:** Capacity retention plots of p-NVPox at 0.1 C in (a) K- half cell and (b) Li-half cell.

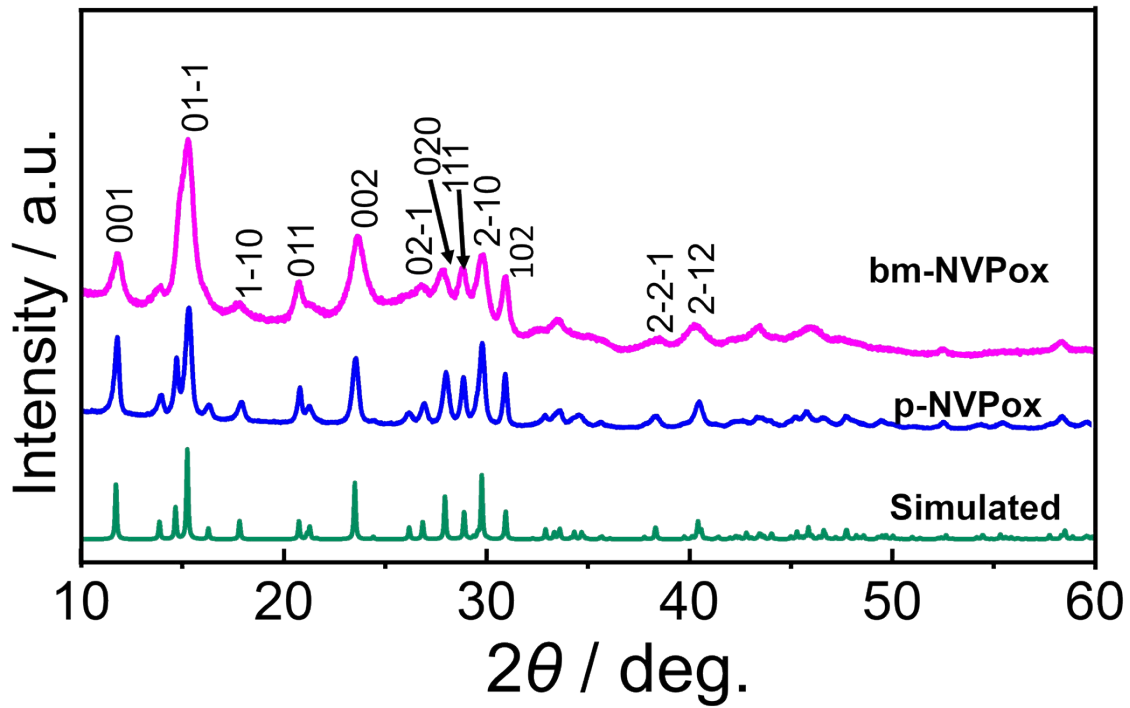

**Fig. S5:** Comparison of XRD patterns of bm-NVPox and p-NVPox with the simulated pattern of  $\text{Na}_2[(\text{VOHPO}_3)_2(\text{C}_2\text{O}_4)] \cdot 2\text{H}_2\text{O}$

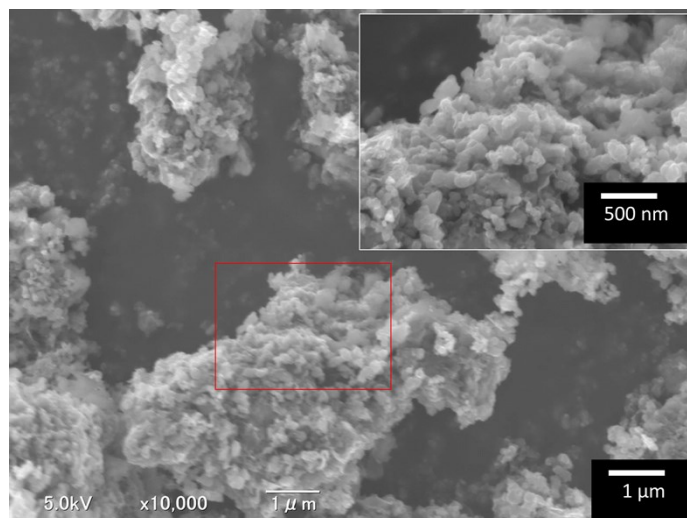

**Fig. S6:** SEM micrograph of bm-NVPox. The inset shows a higher magnification image (x30,000) of the selected area.

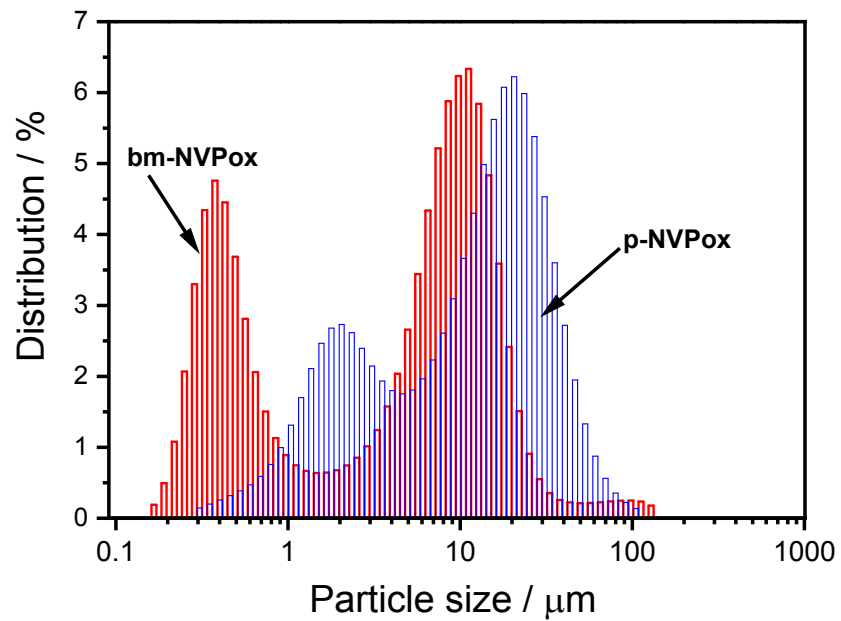

**Fig. S7:** Comparison of particle size of ball milled NVPOx and the pristine sample.



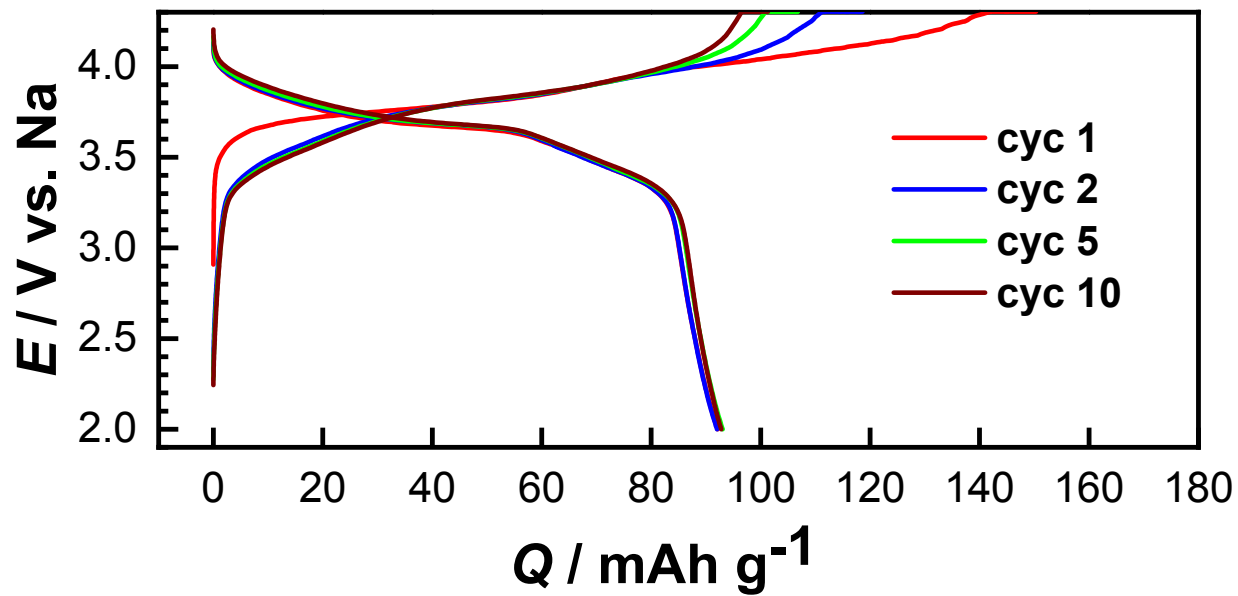

**Fig. S8:** Charge-discharge profiles of bm-NVPox for 10 cycles at 0.1 C current rate in the potential range of 2.0-4.3 V.

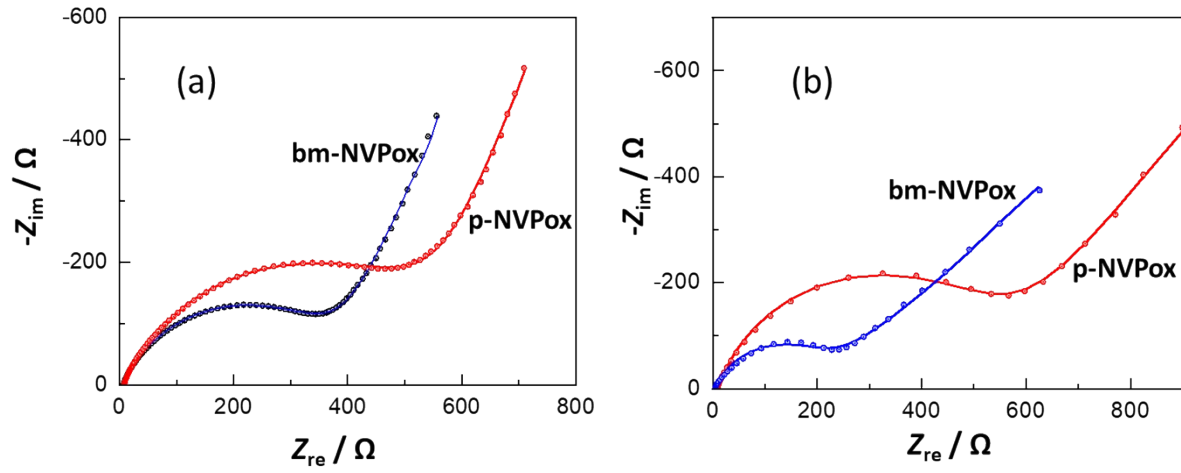

**Fig. S9:** Nyquist plots of p-NVPox and bm-NVPox during first cycle: (a) charged state (4.3V) and (b) discharged state (2.0 V). The circles represent experimental values and the solid line represent fitted results.

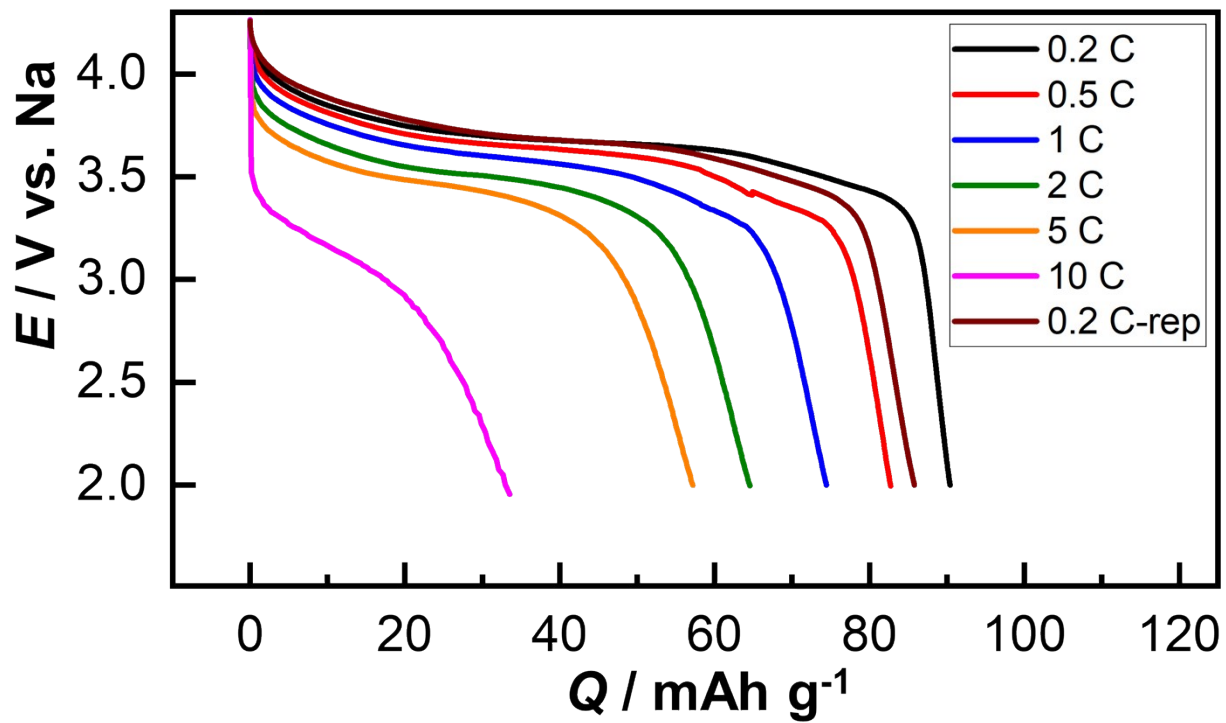

**Fig. S10:** Comparison of discharge profiles of p-NVPox at different current rates.

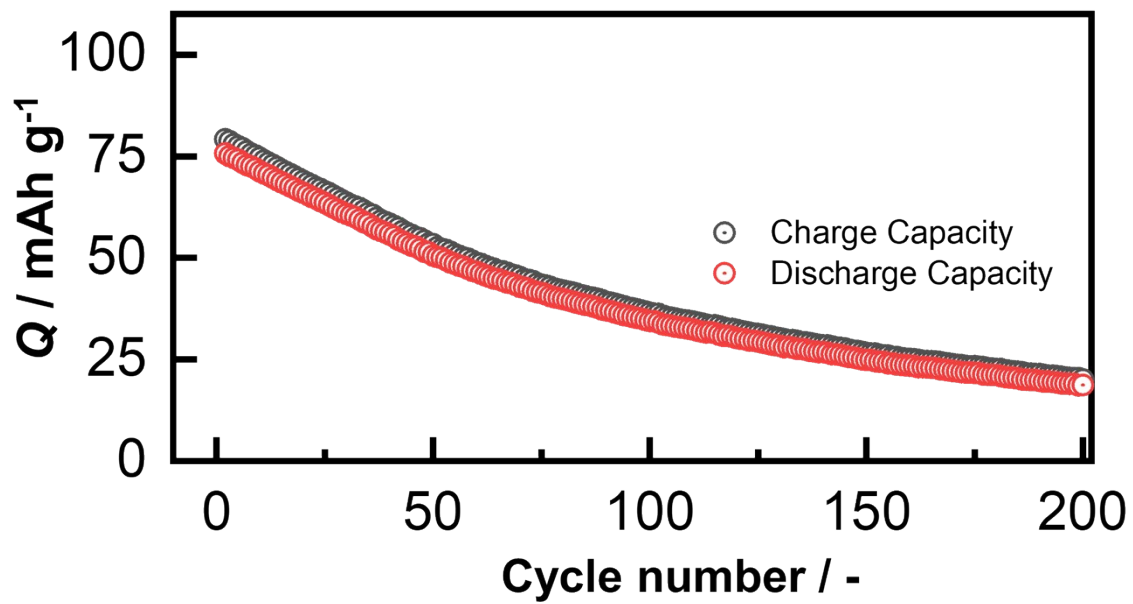

**Fig. S11:** Long term cycling of p-NVPox at 2 C rate showing charge and discharge capacities for 200 cycles.

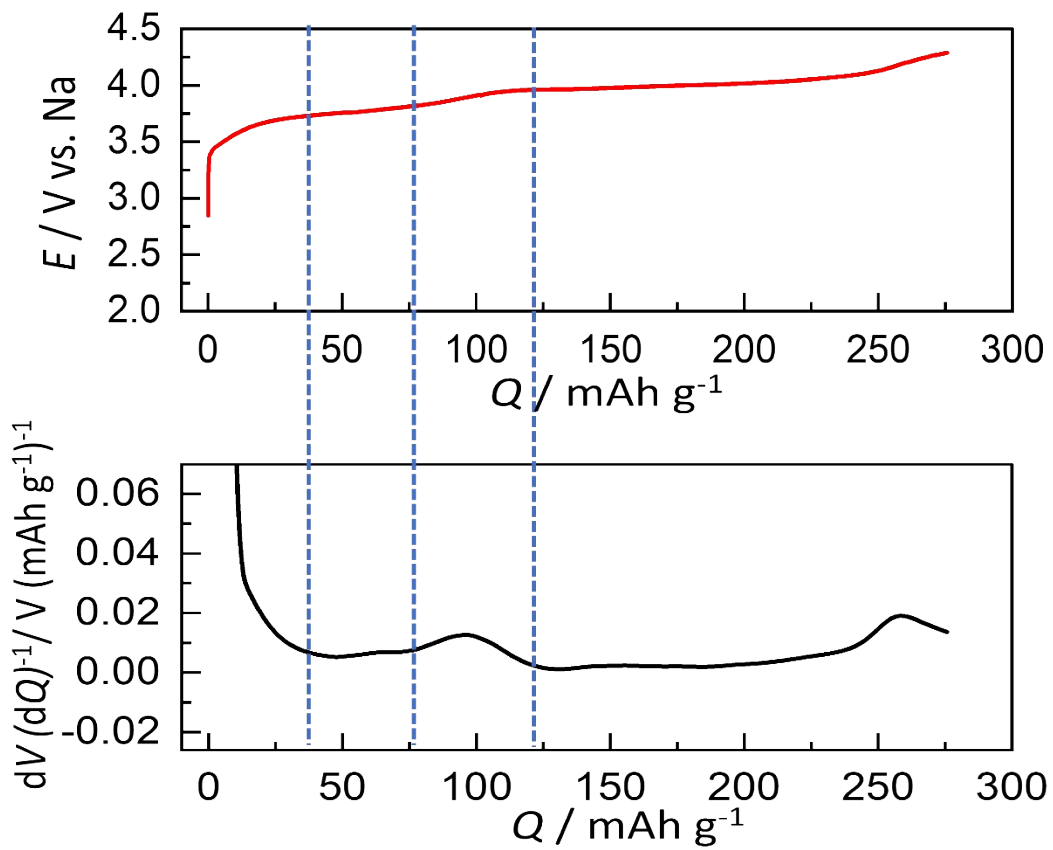

**Fig. S12:** Differential voltage analysis ( $dV/dQ$ ) of the first charge curve of p-NVPox during the operando XRD measurement.

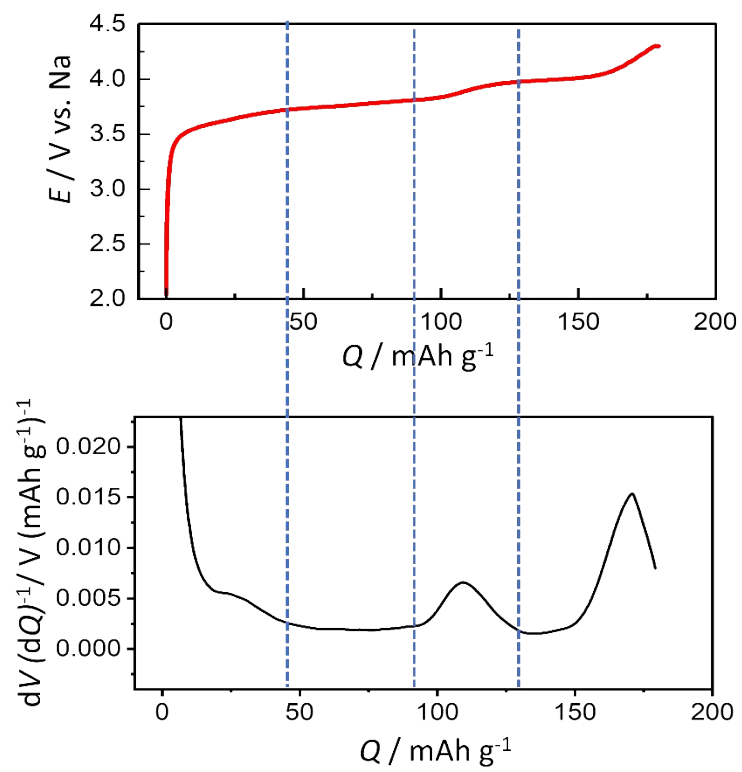

**Fig. S13:** Differential voltage analysis ( $dV/dQ$ ) of the first charge curve of p-NVPox in a coin cell.

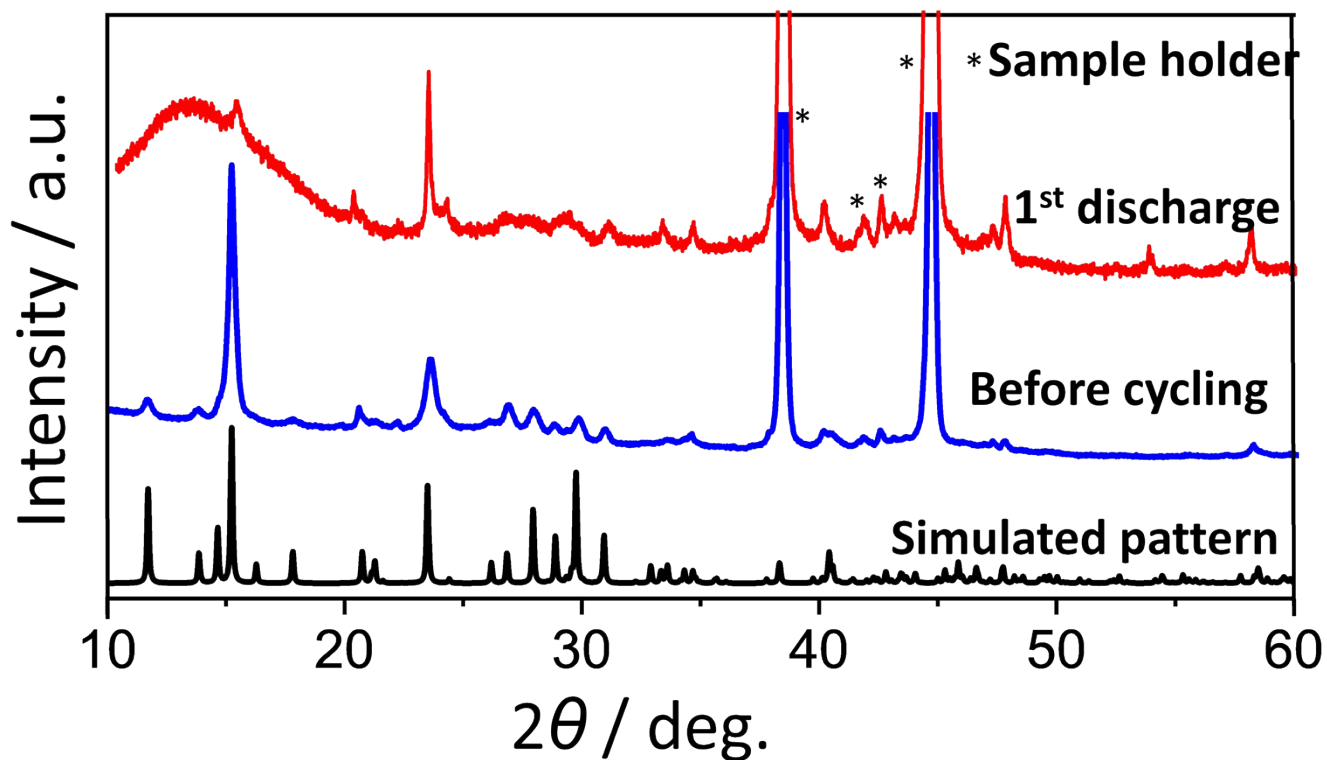

**Fig. S14:** XRD patterns of p-NVPox electrode before cycling and at the end of first discharge compared with the simulated pattern of NVPOx.

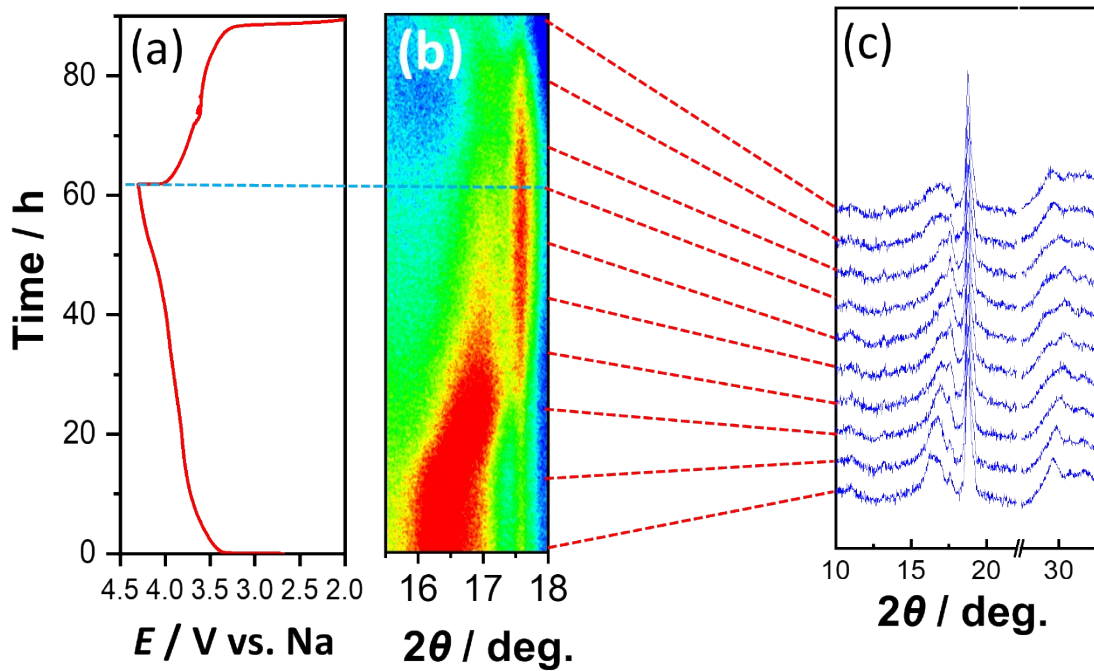

**Fig. S15:** Structural evolution during second Na extraction/insertion: a) Charge-discharge profile during the operando XRD measurement, (b) contour maps of operando XRD for selected  $2\theta$  regions and c) XRD patterns at selected SOC.



### **Synthesis of c-NaTi<sub>2</sub>(PO<sub>4</sub>)<sub>3</sub>**

0.01 M Ti(OBu)<sub>4</sub> was added to 40 mL of 30% H<sub>2</sub>O<sub>2</sub> with constant stirring and 15 mL of 28% NH<sub>4</sub>OH was added and stirred. Then stoichiometric amounts of citric acid, (NH<sub>4</sub>)<sub>2</sub>HPO<sub>4</sub> and Na<sub>2</sub>CO<sub>3</sub> were added, followed by ethylene glycol. After stirring for few hours, the resulting solution was dried at 80 °C in air under constant stirring. The powder was calcined at 350 °C for 3h in air and then at 700 °C for 12h in air to obtain the white NaTi<sub>2</sub>(PO<sub>4</sub>)<sub>3</sub>.(NTP) powder. The carbon coating was carried out by hydrothermal treatment of NTP(200 mg) with sucrose (500 mg) at 180 °C for 6h, followed by calcination at 800 °C for 1h in Ar.

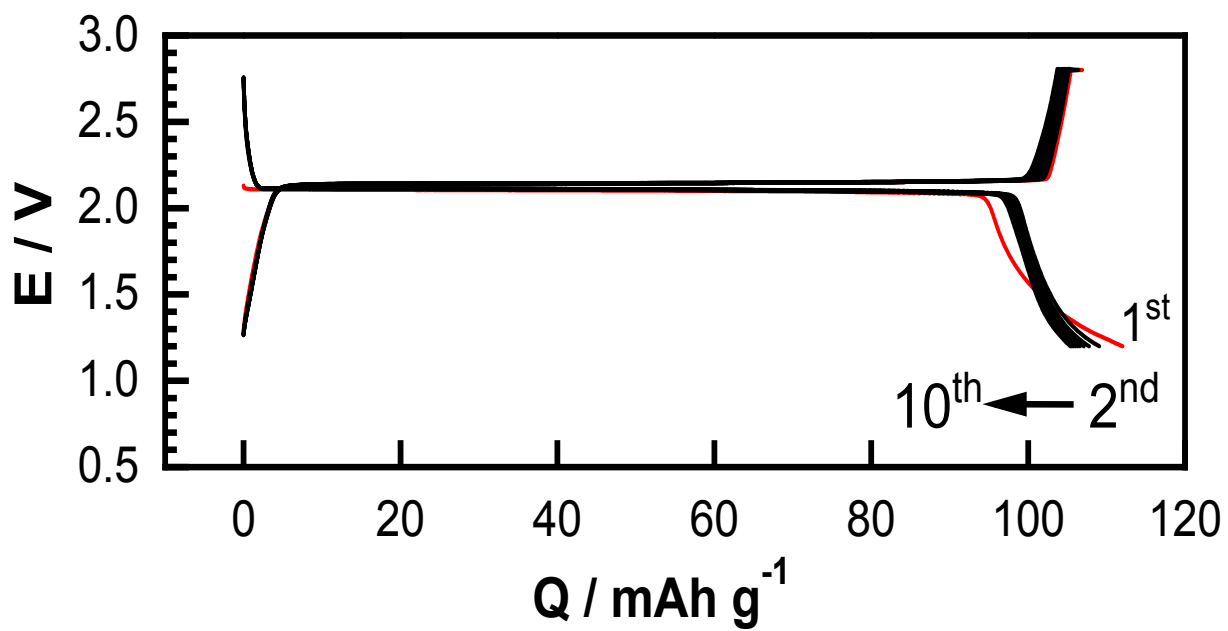

**Fig. S16:** Charge-discharge profiles of a  $\text{NaTi}_2(\text{PO}_4)_3$  (NTP) half-cells

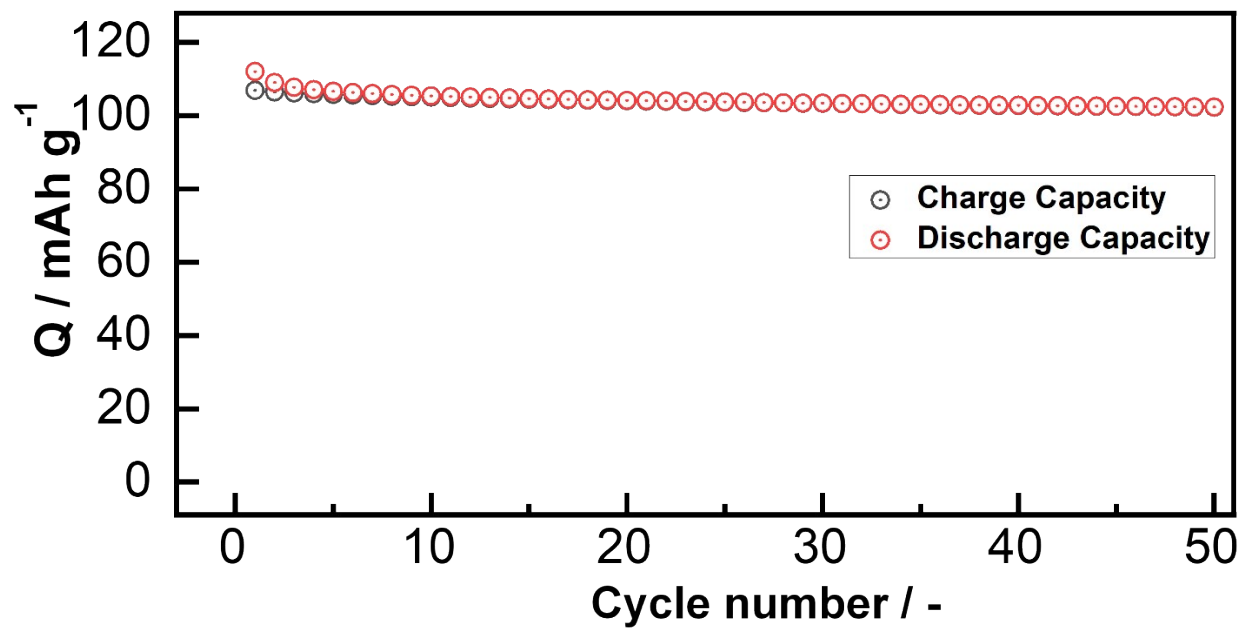

Fig. S17: Capacity retention plots of a NaTi<sub>2</sub>(PO<sub>4</sub>)<sub>3</sub> (NTP) half-cell.
